# Supplementary material
Source: HighWire-hosted journal article supplement (https://www.annals.org/content/suppl/2007/08/06/147.3.194)
Supplement: Williams_RS_147-3-194-DC2-AT01.pdf [file Williams_RS_147-3-194-DC2-AT01.pdf]

**Appendix Table 1. Recommendations for Child Safety Seats Based on Age and Weight\***

| Population               | Age; Weight                                           | Seat Type; Position†                                                                                                                                          |
|--------------------------|-------------------------------------------------------|---------------------------------------------------------------------------------------------------------------------------------------------------------------|
| Infants                  | Birth to at least 1 y; $\leq$ 20 lb<br><1 y; 20–35 lb | Infant-only seats or convertible seats; rear-facing seat‡, positioned in the back seat§<br>Convertible seats; rear-facing seat‡, positioned in the back seat§ |
| Toddlers or preschoolers | 1–4 y; $\geq$ 20 lbs to $\approx$ 40 lb               | Convertible seat  ; forward-facing or forward facing–only seat or high-back booster seat with harness, positioned in the back seat§                           |
| Young children           | 4 to at least 8 y, unless height is 4'9" (57")        | Belt-positioning booster seat or high-back, belt-positioning booster seat; positioned in the back seat                                                        |

\* Data from reference 18.

† Types of child safety seats are defined in Appendix Table 2. Consult the National Highway Traffic Safety Administration General Child Seat Use Information for other essential use specifications (18).

‡ Rear-facing child safety seat must not be placed in the front passenger seat of any vehicle equipped with an airbag on the front passenger side. Death or serious injury can occur from the impact of the airbag against the child safety seat.

§ Seats should be secured to the vehicle by the safety belts or a “lower anchor and tether for children” (LATCH), which is available in some cars.

|| Select a convertible seat that is designed for heavier infants.
