# Supplementary material
Source: HighWire-hosted journal article supplement (https://www.annals.org/content/suppl/2007/08/06/147.3.194)
Supplement: Williams_RS_147-3-194-DC2-AT02.pdf [file Williams_RS_147-3-194-DC2-AT02.pdf]

**Appendix Table 2. Search Strategy**

**Search Strategy**

**Key questions 1 and 2: Restraints, 1992–July 2005\***

1. Seat Belts/
2. Automobile restraint\$.ti,ab.
3. Back seat.ti,ab.
4. Booster seat\$.ti,ab.
5. Car restraint\$.ti,ab.
6. Car safety.ti,ab.
7. Car seat\$.ti,ab.
8. Carseat\$.ti,ab.
9. Child restraint\$.ti,ab.
10. Child seat\$.ti,ab.
11. Front seat.ti,ab.
12. Infant restraint\$.ti,ab.
13. Lap belt\$.ti,ab.
14. Rear seat.ti,ab.
15. Safety belt\$.ti,ab.
16. Safety restraint\$.ti,ab.
17. Safety seat\$.ti,ab.
18. Seat belt\$.ti,ab.
19. Seatbelt\$.ti,ab.
20. Shoulder belt\$.ti,ab.
21. Vehicle restraint\$.ti,ab.
22. belt position\$.ti,ab.
23. 1 or 2 or 3 or 4 or 5 or 6 or 7 or 8 or 9 or 10 or 11 or 12 or 13 or 14 or 15 or 16 or 17 or 18 or 19 or 20 or 21 or 22
24. health education/
25. Health promotion/
26. Mothers/ed [Education]
27. Behavior therapy/
28. Counseling/
29. Directive counseling/
30. Parents/ed [Education]
31. Patient education/
32. Physician's Role/
33. Student health services/
34. Teaching Materials/
35. "Wounds and Injuries"/pc [Prevention & Control]
36. advice.ti,ab.
37. advise.ti,ab.
38. counsel\$.ti,ab.
39. intervention\$.ti,ab.
40. motivational interview\$.ti,ab.
41. 24 or 25 or 26 or 27 or 28 or 29 or 30 or 31 or 32 or 33 or 34 or 35 or 36 or 37 or 38 or 39 or 40 (379 486)
42. 23 and 41
43. limit 42 to english language
44. limit 43 to (comment or news)
45. 43 not 44
46. limit 45 to yr="1992 - 2005"

**Key questions 1 and 3: Riding with alcohol-impaired drivers, 1966–July 2005\***

1. passenger\$.ti,ab.
2. riding.ti,ab.
3. rider.ti,ab.
4. riders.ti,ab.
5. 1 or 2 or 3 or 4
6. alcohol.mp.
7. alcoholic.mp.
8. drinking.mp.
9. drinker\$.ti,ab.
10. intoxicate\$.ti,ab.
11. drunk.ti,ab.
12. impaired.ti,ab. and (driver\$ or driving).mp.
13. 6 or 7 or 8 or 9 or 10 or 11 or 12
14. 5 and 13
15. health education/
16. Health promotion/

**Appendix Table 2—Continued**

17. Mothers/ed [Education]
18. Behavior therapy/
19. Counseling/
20. Directive counseling/
21. Parents/ed [Education]
22. Patient education/
23. Physician's Role/
24. Student health services/
25. Teaching Materials/
26. "Wounds and Injuries"/pc [Prevention & Control]
27. advice.ti,ab.
28. advise.ti,ab.
29. counsel\$.ti,ab.
30. intervention\$.ti,ab.
31. motivational interview\$.ti,ab.
32. 15 or 16 or 17 or 18 or 19 or 20 or 21 or 22 or 23 or 24 or 25 or 26 or 27 or 28 or 29 or 30 or 31 (379 486)
33. 14 and 32
34. limit 33 to english language
35. limit 34 to (comment or editorial or letter or news)
36. 34 not 35
37. from 36 keep 1-71

**Key questions 1 and 3: Alcohol and driving, 1999–September 2005\***

1. Alcohol Drinking/
2. Alcoholic Intoxication/
3. Alcoholism/
4. Drinking Behavior/
5. alcohol.ti,ab.
6. alcoholic.ti,ab.
7. drink.ti,ab.
8. drinking.ti,ab.
9. drinker\$.ti,ab.
10. drunk.ti,ab.
11. intoxicate\$.ti,ab.
12. under the influence.ti,ab.
13. 1 or 2 or 3 or 4 or 5 or 6 or 7 or 8 or 9 or 10 or 11 or 12 (167 771)
14. Accidents, traffic/
15. Automobile driving/
16. automobile\$.ti,ab.
17. drive.ti,ab.
18. driver.ti,ab.
19. drivers.ti,ab.
20. driving.ti,ab.
21. vehicle\$.ti,ab.
22. vehicular\$.ti,ab.
23. 14 or 15 or 16 or 17 or 18 or 19 or 20 or 21 or 22
24. Health education/
25. Health promotion/
26. Behavior therapy/
27. Counseling/
28. Directive counseling/
29. Patient education/
30. Physician's Role/
31. Student health services/ (
32. Teaching Materials/
33. advice.ti,ab.
34. advise.ti,ab.
35. counsel\$.ti,ab.
36. intervention\$.ti,ab.
37. motivational interview\$.ti,ab.
38. 24 or 25 or 26 or 27 or 28 or 29 or 30 or 31 or 32 or 33 or 34 or 35 or 36 or 37
39. 13 and 23 and 38
40. Accident Prevention/
41. "Wounds and Injuries"/pc [Prevention & Control]
42. 40 or 41
43. 13 and 42

*Continued*

*Continued*

**Appendix Table 2—Continued**

- 44. 39 or 43
- 45. limit 44 to english language
- 46. limit 45 to animals
- 47. limit 46 to humans
- 48. 46 not 47
- 49. 45 not 48
- 50. (news or comment).pt.
- 51. 49 not 50
- 52. limit 51 to yr="2002 - 2005"
- 53. from 52 keep 1-235

**Key question 4: Harms, 1966–September 2005†**

- 1. risk compensation.ti,ab.
- 2. risks compensation.ti,ab.
- 3. risk homeostasis.ti,ab.
- 4. offsetting behavio\$.ti,ab.
- 5. risk\$ driv\$.ti,ab.
- 6. reckless driv\$.ti,ab.
- 7. driv\$ recklessly.ti,ab.
- 8. compensating behavio\$.ti,ab.
- 9. behavio?\$ compensation.ti,ab.
- 10. 1 or 2 or 3 or 4 or 5 or 6 or 7 or 8 or 9
- 11. health education/
- 12. health promotion/
- 13. mothers/ed
- 14. behavior therapy/
- 15. counseling/
- 16. directive counseling/
- 17. parents/ed
- 18. patient education/
- 19. physician's role/
- 20. student health services/
- 21. teaching materials/
- 22. "wounds and injuries"/pc
- 23. advice.ti,ab.
- 24. advise.ti,ab.
- 25. counsel\$.ti,ab.
- 26. intervention\$.ti,ab.
- 27. motivational interview\$.ti,ab.
- 28. 11 or 12 or 13 or 14 or 15 or 16 or 17 or 18 or 19 or 20 or 21 or 22 or 23 or 24 or 25 or 26 or 27 (391 108)
- 29. 10 and 28
- 30. limit 29 to english language
- 31. from 30 keep 1-61

**Cost, through September 2005‡**

- 1. Automobile restraint
- 2. Back seat
- 3. Booster seat
- 4. Car restraint
- 5. Car safety
- 6. Car seat
- 7. Carseat
- 8. Child restraint
- 9. Child seat
- 10. Front seat
- 11. Infant restraint
- 12. Lap belt
- 13. Rear seat
- 14. Safety belt
- 15. Safety restraint
- 16. Safety seat
- 17. Seat belt
- 18. Seatbelt
- 19. Shoulder belt
- 20. Vehicle restraint
- 21. Belt position
- 22. 1 or 2 or 3 or 4 or 5 or 6 or 7 or 8 or 9 or 10 or 11 or 12 or 13 or 14 or 15 or 16 or 17 or 18 or 19 or 20 or 21

**Appendix Table 2—Continued**

- 23. alcohol
- 24. drinking
- 25. drinker
- 26. intoxicate
- 27. drunk
- 28. impaired
- 29. under the influence
- 30. 23 or 24 or 25 or 26 or 27 or 28 or 29
- 31. driver
- 32. driving
- 33. vehicle
- 34. automobile
- 35. 31 or 32 or 33 or 34
- 36. 30 and 35
- 37. 22 or 36
- 38. health education
- 39. Health promotion
- 40. Patient education
- 41. Physician's Role
- 42. advice
- 43. advise
- 44. counsel
- 45. intervention
- 46. 38 or 39 or 40 or 41 or 42 or 43 or 44 or 45
- 47. 37 and 46

\* MEDLINE, Cochrane Central Registry of Controlled Trials, Cochrane Database of Systematic Reviews, PsycINFO, CINAHL, and Traffic Research Information Service.

† MEDLINE and Traffic Research Information Service.

‡ National Health Service Economic Evaluation Database.

*Continued*
