# Supplementary material
Source: HighWire-hosted journal article supplement (https://www.annals.org/content/suppl/2007/08/06/147.3.194)
Supplement: Williams_RS_147-3-194-DC2-AT03.pdf [file Williams_RS_147-3-194-DC2-AT03.pdf]

---

**Appendix Table 3. Inclusion and Exclusion Criteria for Motor Vehicle Occupant Injury Prevention**

**Inclusion criteria**

Intervention: Study evaluates a behavioral counseling intervention targeting restraint use (including safety seats, booster seats, seat belts, correct use, and seat location) or alcohol-impaired driving or riding  
Age groups: All age groups  
Outcomes: Use and correct use of age- and weight-appropriate restraints; decreased alcohol-impaired driving or riding with alcohol-impaired drivers; decreased morbidity or mortality of occupants in motor vehicle accidents; harms from counseling

**Exclusion criteria**

Nonhumans  
Non-English-language abstract  
Study does not evaluate a behavioral counseling intervention targeting restraint use or alcohol-impaired driving or riding with alcohol-impaired drivers  
Setting: Intervention not done in primary care, not feasible for primary care, or not widely available for primary care referral, as described in Appendix Table 4  
Population: Selective population not normally seen in primary care (e.g., patients recruited from emergency department or other specialty setting who are injured or intoxicated and do not represent a general patient population)  
Country: Study not conducted in a country with United Nations human development index similar to U.S. population  
Outcomes: Does not report designated outcomes (see above)  
Study quality: Does not meet U.S. Preventive Services Task Force criteria for quality  
Study designs: Editorials, letters, non-systematic reviews, non-comparative studies, case-control studies

---
