# Supplementary material
Source: HighWire-hosted journal article supplement (https://www.annals.org/content/suppl/2007/08/06/147.3.194)
Supplement: Williams_RS_147-3-194-DC2-AT04.pdf [file Williams_RS_147-3-194-DC2-AT04.pdf]

**Appendix Table 4. Criteria for Interventions Judged to Be Relevant or Feasible to Primary Care**

| Variable         | Criteria                                                                                                                                                                                                                                                                                                                                                                                                                          |
|------------------|-----------------------------------------------------------------------------------------------------------------------------------------------------------------------------------------------------------------------------------------------------------------------------------------------------------------------------------------------------------------------------------------------------------------------------------|
| Whom targeted?   | Involve individual-level identification of being a patient or being in need of intervention                                                                                                                                                                                                                                                                                                                                       |
| Who delivered?   | Usually involve primary care clinicians (physicians in family practice, internal medicine, obstetrics-gynecology, pediatrics, general practitioner); other physicians, nurses, nurse practitioners, physician assistants, or related clinical staff (dietitians, health educators, other counselors) in a direct or indirect way; or, at least, the participant would see the intervention as connected to the health care system |
| How delivered?   | To individuals or in small groups ( $\leq 15$ persons); does not involve only or primarily group-level interventions outside the primary care setting to achieve behavioral changes; generally involves no more than 8 group sessions, and an intervention period no longer than 12 months                                                                                                                                        |
| Where delivered? | Could be delivered anywhere (including via the Web, interactive technologies, and in the home) if linked to primary care as above                                                                                                                                                                                                                                                                                                 |
