# Supplementary material
Source: HighWire-hosted journal article supplement (https://www.annals.org/content/suppl/2007/08/06/147.3.194)
Supplement: Williams_RS_147-3-194-DC2-AT06.pdf [file Williams_RS_147-3-194-DC2-AT06.pdf]

Appendix Table 6. Included Studies: Children Age 0 to 4 Years\*

| Study, Year (Reference)             | Target Behavior                                                                                                                                                                             | Setting                                     | Study Design; Location; Target Population                                                                                     | Study Population                                                                                                                                                                                                                                                                                                | Baseline Data on Use       | Inclusion and Exclusion Criteria                                                                                                                                                 | Description of Intervention                                                                                                                                                                                                                                                                                                                                                                                                                                                                                                                                                                                                                                                                                                                                                                              |
|-------------------------------------|---------------------------------------------------------------------------------------------------------------------------------------------------------------------------------------------|---------------------------------------------|-------------------------------------------------------------------------------------------------------------------------------|-----------------------------------------------------------------------------------------------------------------------------------------------------------------------------------------------------------------------------------------------------------------------------------------------------------------|----------------------------|----------------------------------------------------------------------------------------------------------------------------------------------------------------------------------|----------------------------------------------------------------------------------------------------------------------------------------------------------------------------------------------------------------------------------------------------------------------------------------------------------------------------------------------------------------------------------------------------------------------------------------------------------------------------------------------------------------------------------------------------------------------------------------------------------------------------------------------------------------------------------------------------------------------------------------------------------------------------------------------------------|
| <b>PC setting during WCC visits</b> |                                                                                                                                                                                             |                                             |                                                                                                                               |                                                                                                                                                                                                                                                                                                                 |                            |                                                                                                                                                                                  |                                                                                                                                                                                                                                                                                                                                                                                                                                                                                                                                                                                                                                                                                                                                                                                                          |
| Guyer et al., 1989 (36)             | Child restraints; age 0–5 y<br>Burns, poisonings, suffocations, falls                                                                                                                       | PC component and peripartum hospitalization | CCT; 14 communities in Massachusetts; families with children age 0–5 y                                                        | n = 286 676<br>Age: NR<br>% male: NR<br>% minority: NR<br>SES: NR                                                                                                                                                                                                                                               | 49% using child restraints | Inclusion: ≥1 child in household age <19 y<br>Exclusion: NR                                                                                                                      | IG: Concurrent implementation of 5 injury prevention projects conducted in health care settings and the community. Components targeting infant and child safety seat use included injury counseling by pediatricians during WCC visits for children up to age 5 y by using Framingham Safety Surveys and promotion of infant safety seat restraints for infants leaving maternity hospitals and in preschool-age children.<br>CG: None of the 5 injury prevention projects were implemented. (Population had incidental participatory exposure to MVOI-related interventions: 14% at baseline and 34% at 2 y after intervention.) Exposure to the intervention was assessed through telephone survey respondents grouped into 3 groups.                                                                  |
| Kelly et al., 1987 (27)             | Infant car seat<br>Other behaviors: home safety, such as fires and burns, falls, poisoning; drowning, suffocation, and choking; injuries due to sharp and heavy objects; electrical hazards | PC pediatrics                               | RCT; New Haven, CT; community hospital PC clinic                                                                              | Overall:<br>n = 171<br>Age: NR<br>% male: NR<br>% minority: NR<br>SES: NR<br>IG:<br>n = 85<br>Maternal age: 23.4 y<br>% male in household: 18<br>% minority: 96<br>SES: 91 receiving welfare<br>CG:<br>n = 86<br>Maternal age: 23.6 y<br>% male in household: 20<br>% minority: 93<br>SES: 94 receiving welfare | NR                         | Inclusion: Attendance at primary care clinic for infant WCC visits<br>Exclusion: Did not continue WCC visits because of poor adherence, moving, or changing to another physician | IG: 3-part series of age-appropriate, tailored safety information requiring active parent participation given by physician at 6-, 9-, and 12-mo WCC visit.<br>CG: Routine safety information was given as part of WCC visits.                                                                                                                                                                                                                                                                                                                                                                                                                                                                                                                                                                            |
| Liberato et al., 1989 (28)          | Infant and child car seats                                                                                                                                                                  | PC pediatrics                               | RCT (randomized clinics); Phoenix, AZ; 6 randomly selected county outpatient care clinics, medically indigent, 66.9% minority | n = 900 people (observed driving in the clinic parking lot)<br>Age: NR<br>% male: NR<br>% minority: NR<br>SES: NR                                                                                                                                                                                               | IG, 25.1%; CG, 12.2%       | Inclusion: Parents of children age 0–4 y receiving outpatient care at clinic<br>Exclusion: Did not drive to clinic                                                               | IG: Parking lot drivers with unrestrained children (age 0–4 y) were given a printed warning, recommended to obtain a safety seat, and advised to avoid a city citation fee by contacting the health educator who would encourage attendance at a formal class. Drivers with restrained children were given sunshades. Buckle-up stickers and cups with information were distributed in waiting rooms; waiting room presentation participants were given sunshades; bulletin boards displayed information. Clinic staff (not physicians) provided verbal reinforcement and incentives when subject arose. Monthly 1-h meetings by health educator and lottery drawing of a car seat.<br>CG preintervention: Patients received usual care in maternity clinics and WCCs on the importance of safety seats. |

Continued on following page

Appendix Table 6—Continued

| Study, Year (Reference)                                                            | Target Behavior  | Setting                                                                                                                                  | Study Design; Location; Target Population                                                                          | Study Population                                                                                                                                                                                                                                                                                      | Baseline Data on Use                                                               | Inclusion and Exclusion Criteria                                                                                                                                                                        | Description of Intervention                                                                                                                                                                                                                                                                                                                                                                                                                                                                                                                                                                                                                                                         |
|------------------------------------------------------------------------------------|------------------|------------------------------------------------------------------------------------------------------------------------------------------|--------------------------------------------------------------------------------------------------------------------|-------------------------------------------------------------------------------------------------------------------------------------------------------------------------------------------------------------------------------------------------------------------------------------------------------|------------------------------------------------------------------------------------|---------------------------------------------------------------------------------------------------------------------------------------------------------------------------------------------------------|-------------------------------------------------------------------------------------------------------------------------------------------------------------------------------------------------------------------------------------------------------------------------------------------------------------------------------------------------------------------------------------------------------------------------------------------------------------------------------------------------------------------------------------------------------------------------------------------------------------------------------------------------------------------------------------|
| Reisinger et al., 1981 (37)                                                        | Infant car seat  | PC postpartum and PC WCC visit                                                                                                           | CCT; Pittsburgh, PA                                                                                                | Overall:<br><i>n</i> = 269<br>Age: NR<br>% male: 0<br>% minority: NR, "almost entirely white"<br>SES: "middle and upper middle class"<br>IG:<br><i>n</i> = 127<br>Age: 27 y<br>% male: 0<br>% minority: NR<br>CG:<br><i>n</i> = 142<br>Age: 26 y<br>% male: 0<br>% minority: NR                       | NA                                                                                 | Inclusion: Requested 3 pediatricians within a group practice and came in for ≥1 follow-up visit<br>Exclusion: NR                                                                                        | IG: Received education on infant car seat delivered by physician-pediatrician at postpartum hospital stay and WCC visits at 1 mo and 2 mo. Pamphlet and formal prescription at postpartum visit; tailored message at 1 mo and 2 mo; demonstration by pediatrician of seat use at 1 mo.<br>CG: Received educational messages that did not include car seat use.                                                                                                                                                                                                                                                                                                                      |
| Scherz, 1976 (38)                                                                  | Infant car seats | PC pediatrics                                                                                                                            | CCT; WCC in a U.S. Army medical center in Tacoma, WA                                                               | <i>n</i> = 500<br>Age: NR<br>% male: NR<br>% minority: NR<br>SES: NR                                                                                                                                                                                                                                  | NR                                                                                 | Inclusion: Attendance at 4-wk WCC visit<br>Exclusion: NR                                                                                                                                                | IG4: Display, pamphlet, 1–5 min with physician-pediatrician encouraging purchase of infant car seat.<br>IG3: Display, pamphlet, 1–2 min from registered nurse encouraging purchase of infant car seat.<br>IG2: Display and pamphlet.<br>IG1: Information display only.<br>CG: No stimulus.                                                                                                                                                                                                                                                                                                                                                                                          |
| <b>Antepartum PC setting only</b><br>Alvarez and Jason, 1993 (29); study 2         | Infant car seats | PC prenatal visit                                                                                                                        | RCT; Chicago, IL; low-income Hispanic population                                                                   | <i>n</i> = 14<br>Age: NR<br>% male: 0<br>% minority: 100<br>SES: 2 single mothers on public assistance, 12 married women whose husbands were laborers                                                                                                                                                 | 13 of 14 infants were not restrained in a random sample of newborns at same clinic | Inclusion: NR<br>Exclusion: NR                                                                                                                                                                          | IG1: At a prenatal visit during the last month of pregnancy with an unspecified type of provider, participants received discussion of Illinois child passenger legislation, an explanation of the benefits of automobile restraint devices along with behavior modification strategies for use, a list of available infant and toddler restraints, and a demonstration of appropriate use of 1 type of restraint. At initial visit, participants received an infant automobile restraint device on loan for 5 mo for a \$10 deposit.<br>IG2: Same as above, but the restraint device was made available at the 6-wk postpartum visit instead of during the last month of pregnancy. |
| Serwint et al., 1996 (30)                                                          | Infant car seats | PC prenatal pediatrics<br>Breastfeeding; emergency department visits; circumcision; health maintenance; mother–pediatrician relationship | RCT (block randomization); urban, hospital-based, resident clinic; low-income, primarily African-American families | Overall ( <i>n</i> = 156)<br>IG:<br><i>n</i> = 81<br>Mean age: 20.2 y (SD, 2.1)<br>% male: 0<br>% minority: 91 African American<br>SES: 98 (medical assistance)<br>CG:<br><i>n</i> = 75<br>Mean age: 20.7 y (SD, 2.5)<br>% male: 0<br>% minority: 91 African American<br>SES: 95 (medical assistance) | NA                                                                                 | Inclusion: Nulliparous women, age ≥18 y, fetus of gestational age ≤28 wk, not yet selected a pediatrician<br>Exclusion: Admitted to prenatal drug use, had a recognized psychiatric illness, or had HIV | IG: Had a prenatal visit with a pediatrician scheduled between 32 wk and 36 wk of gestation; received a welcome letter to the pediatric clinic with a brochure for proper health care utilization; counseled by a postgraduate year–2 pediatric resident on multiple anticipatory guidance topics if attended visit.<br>CG: Not offered a visit; received card with future pediatrician information, welcome letter, and brochure.                                                                                                                                                                                                                                                  |
| <b>Peripartum inpatient setting only</b><br>Christophersen and Sullivan, 1982 (31) | Infant car seats | Peripartum hospitalization                                                                                                               | RCT; suburban Kansas City, MO, hospital                                                                            | <i>n</i> = 30<br>Age: NR<br>% male: 0<br>% minority: NR<br>SES: NR (see comments)                                                                                                                                                                                                                     | NA                                                                                 | Inclusion: Delivered a single live-born infant; baby's physician within 10 miles<br>Exclusion: NR                                                                                                       | IG: Discharge staff person brought in a free loaner car seat at time of discharge and then offered to demonstrate proper infant placement in seat before leaving room, carrying infant in seat, and correct restraining with lap belt in family's vehicle; if mother declined, no further effort was made.<br>CG: Usual care.                                                                                                                                                                                                                                                                                                                                                       |

Appendix Table 6—Continued

| Study, Year (Reference)                            | Target Behavior  | Setting                                                                              | Study Design; Location; Target Population                                                                                        | Study Population                                                                                                                                                                                                                                                                                                                                                                                | Baseline Data on Use                                                            | Inclusion and Exclusion Criteria                                                                                                                                                                                                                                                                           | Description of Intervention                                                                                                                                                                                                                                                                                                                                                                           |
|----------------------------------------------------|------------------|--------------------------------------------------------------------------------------|----------------------------------------------------------------------------------------------------------------------------------|-------------------------------------------------------------------------------------------------------------------------------------------------------------------------------------------------------------------------------------------------------------------------------------------------------------------------------------------------------------------------------------------------|---------------------------------------------------------------------------------|------------------------------------------------------------------------------------------------------------------------------------------------------------------------------------------------------------------------------------------------------------------------------------------------------------|-------------------------------------------------------------------------------------------------------------------------------------------------------------------------------------------------------------------------------------------------------------------------------------------------------------------------------------------------------------------------------------------------------|
| Lindqvist, 1993 (39)                               | Infant car seats | Peripartum hospitalization                                                           | CCT (group-level); Sweden; 3 community hospitals in smaller cities                                                               | Overall:<br>n = 1157<br>Age: NR<br>% male: 0<br>% minority: NR<br>SES: NR<br>IG:<br>n = 764<br>SES: 97.9% car ownership<br>CG:<br>n = 393<br>SES: 96.4% car ownership                                                                                                                                                                                                                           | NA                                                                              | Inclusion: Live birth at the participating hospitals during the test period<br>Exclusion: NR                                                                                                                                                                                                               | IG: An infant car seat was loaned free of charge during the mother's postpartum inpatient hospitalization; maternity ward staff demonstrated the use of the seat and parents viewed videotape; seats were returned at 9 mo.<br>CG: Usual care.                                                                                                                                                        |
| Reisinger and Williams, 1978 (40)                  | Infant car seats | Peripartum hospitalization                                                           | CCT; Pittsburgh, PA; couples before postnatal discharge                                                                          | n = 1103<br>Age: NR<br>% male: 0<br>% minority: NR<br>SES: NR                                                                                                                                                                                                                                                                                                                                   | NA                                                                              | Inclusion: Delivered live baby within the study period<br>Exclusion: Babies who were to be adopted, those whose babies died, did not speak English or were deaf, no car ownership, were not discharged before next treatment group was initiated                                                           | IG1: Received 2 pamphlets from research staff with training on child safety seat use and given in-room access to purchase car seat; seat delivered to room and correct use demonstrated for women who purchased it.<br>IG2: Same as IG1, but also visit from health educator on use of car seat.<br>IG3: Same as IG1 and offered free car seat.<br>CG: Car seats available for purchase in gift shop. |
| Tietge et al., 1987 (41)                           | Infant car seats | PC peripartum hospitalization                                                        | CCT; major community hospital in San Diego, CA                                                                                   | n = 93<br>Age: NR<br>% male: 0<br>% minority: 16 (calculated value)<br>SES: 73.29% had some college education or more; 65.6% had income ≥\$2000/mo                                                                                                                                                                                                                                              | NA                                                                              | Inclusion: First-time mothers, gave consent, or were discharged during experimental period<br>Exclusion: Could not verify that participant viewed video, or video was not viewed at discharge                                                                                                              | IG2: Watched 14-min video from Physicians for Automotive Safety (including demonstration of proper use of infant safety seat) and 5-min, face-to-face instruction session, which included practice by participant.<br>IG1: Viewed video.<br>CG: Given no safety seat information.                                                                                                                     |
| <b>PC-R education courses</b><br>Barone, 1988 (32) | Car seat         | PC-R parent education classes<br>Other behaviors: water temperature, smoke detectors | RCT (group-level); suburban Kansas City, MO, medical center; parents who elected to participate in a continuing education series | Overall: n = 79 couples or individuals<br>IG:<br>n = 41 couples or individuals<br>Mean age: 32 y (mother), 34 y (father)<br>% male: NR<br>% minority: NR<br>SES, education: mean, 2.98†<br>SES, income: mean, 4.7‡<br>CG:<br>n = 38 couples or individuals<br>Mean age: 32 y (mother), 33 y (father)<br>% male: NR<br>% minority: NR<br>SES, education: mean, 2.87†<br>SES, income: mean, 4.54‡ | NR for IG and CG                                                                | Inclusion: Participation in toddler education class, consented to a home visit and safety assessment, attended health and safety education presentation, lived in dwelling where they could control the setting of the water heater, not engaged in major water use 2 h before home visit<br>Exclusion: NR | IG: Viewed home safety slides; slides addressing water temperature, smoke detectors, and child restraints; 6-min film on crash tests of restrained and unrestrained children; received education packet and digital thermometer.<br>CG: Viewed home safety slides only.                                                                                                                               |
| Goodson et al., 1985 (42)                          | Infant car seats | PC-R prenatal classes                                                                | CCT (group-level); San Francisco, CA; prenatal couples                                                                           | Overall:<br>n = 163<br>Age: NR<br>% male: 0<br>% minority: NR<br>SES: NR<br>Hospital A:<br>n = 67<br>Age: NR<br>% male: 0<br>% minority: 24<br>SES: Median education, 16 y<br>Hospital B:<br>n = 69<br>Age: NR<br>% male: 0<br>% minority: 77<br>SES: Median education, 12 y                                                                                                                    | Seat belt use of parents: hospital A, 6% never wear; hospital B, 38% never wear | Inclusion: Attendance at hospital prenatal class<br>Exclusion: No car ownership                                                                                                                                                                                                                            | IG: Half-hour lecture given by social worker, including a discussion; demonstration of correct use of infant safety seat with a doll; 10-min film by the Insurance Institute for Highway Safety that illustrated crash results of unrestrained infant; question-and-answer session; and brochures.<br>CG: Usual cursory mention of child passenger safety.                                            |

\* CCT = controlled clinical trial; CG = control group; IG = intervention group; MVOI = motor vehicle occupant injury; NA = not applicable; NR = not reported; PC = primary care; PC-R = referable to primary care; RCT = randomized, controlled trial; SES = socioeconomic status; WCC = well-child care.

† SES education of 2 = high school; SES education of 3 = baccalaureate.

‡ SES income of 4 = \$31 000–\$40 000 per year; SES income of 5 = \$41 000–\$50 000 per year.
