# Supplementary material
Source: HighWire-hosted journal article supplement (https://www.annals.org/content/suppl/2007/08/06/147.3.194)
Supplement: Williams_RS_147-3-194-DC2-AT07.pdf [file Williams_RS_147-3-194-DC2-AT07.pdf]

Appendix Table 7. Included Studies: Children Age 0 to 4 Years, Continued\*

| Study, Year (Reference)                  | Goal and Intervention Format                                                                                                                                                                                                                                      | Follow-Up Time Frame               | Outcomes                                                                                                                                                                                                                                                                                                                     | Results                                                                                                                                                                                                                                                                                                              | USPSTF Quality Rating                                                                                                                                                                                |
|------------------------------------------|-------------------------------------------------------------------------------------------------------------------------------------------------------------------------------------------------------------------------------------------------------------------|------------------------------------|------------------------------------------------------------------------------------------------------------------------------------------------------------------------------------------------------------------------------------------------------------------------------------------------------------------------------|----------------------------------------------------------------------------------------------------------------------------------------------------------------------------------------------------------------------------------------------------------------------------------------------------------------------|------------------------------------------------------------------------------------------------------------------------------------------------------------------------------------------------------|
| <b>PC setting during WCC visits</b>      |                                                                                                                                                                                                                                                                   |                                    |                                                                                                                                                                                                                                                                                                                              |                                                                                                                                                                                                                                                                                                                      |                                                                                                                                                                                                      |
| Guyer et al., 1989 (36)                  | PC, hospital-based, and community-based programs to reduce accidental childhood injuries<br>Parents<br>Individual, unclear<br>Intensity varied<br>Counseled on seating location: unclear                                                                          | 2 y                                | Behavioral outcomes: Self-reported use of child safety restraints from approximately 5% of population<br>Health outcomes: MVOI rates (age-adjusted); surveillance through hospitals; measured injuries requiring medical treatment in an emergency department or hospitalization or resulting in death<br>Harms measure: NR  | Self-reported use:<br>IG: Before, 49.1%; after, 65.0%<br>CG: Before, 49.6%; after, 63.3%<br><i>P</i> = NR<br>MVOI rates (per 10 000 children):<br>IG: Before, 46.54; during, 21.54<br>CG: Before, 44.53; during, 60.77<br>Adjusted OR, 2.78 (95% CI, 1.66–4.66)†                                                     | Fair: Baseline characteristics NR, but communities matched on important characteristics; outcomes measured at population level, adjusted for SES                                                     |
| Kelly et al., 1987 (27)                  | To reduce incorrect child restraint behavior through tailored education<br>Parents<br>Individual, print<br>3 contacts for 45 min total<br>Counseled on seating location: unclear                                                                                  | 6 mo after first visit             | Behavioral outcomes: Child riding without restraints or sitting in front seat, assessed through interview or home visit by blinded staff<br>Health outcomes: NR<br>Harms measure: NR                                                                                                                                         | Usually riding without restraint:<br>IG: 67%<br>CG: 70%<br><i>P</i> = NS<br>Usually sitting in front seat:<br>IG: 33%<br>CG: 53%<br><i>P</i> < 0.05                                                                                                                                                                  | Fair to poor: High attrition >30%; analyzed completers only; self-reported outcome; did not specify correct use                                                                                      |
| Liberato et al., 1989 (28)               | To increase car seat use through education, coercion, and incentives<br>Parents of children age 0–4 y<br>Group, individual, print, other<br>Counseled on seating location: no                                                                                     | 6 mo, 12 mo                        | Behavioral outcomes: Observed every third car with a passenger age 0–4 y for car seat use; correct use was not assessed; assumption that the random sampling was representative of seat belt use even though sample was not necessarily the direct recipient of the intervention<br>Health outcomes: NR<br>Harms measure: NR | Safety seat nonuse:<br>IG: 0 mo, 74.9%; 6 mo, 62.3%‡; 12 mo, 64.7%‡<br>CG: 0 mo, 87.8%; 6 mo, 89.1%; 12 mo, 70.0 ( <i>P</i> = NS)                                                                                                                                                                                    | Fair to poor: Unclear whether groups were similar at baseline; observed outcome but did not specify correct use; unclear whether assessor was blinded                                                |
| Reisinger et al., 1981 (37)              | To increase car seat use through education and tailored counseling and modeling<br>Parent<br>Individual, print, modeling 3 contacts over 2 mo; time NR<br>Counseled on seating location: NR                                                                       | 1, 2, 4, and 15 mo                 | Behavioral outcomes: Observation of correct use of infant car seat upon arrival for WCC visits<br>Health outcomes: NR<br>Harms measure: NR                                                                                                                                                                                   | Observed correctly using restraint:<br>1 mo: IG, 38%; CG, 31%<br>2 mo: IG, 50%; CG, 29%<br>4 mo: IG, 47%; CG, 43%<br>15 mo: IG, 56%; CG, 50%                                                                                                                                                                         | Fair: Reported some but not all important baseline characteristics; blinded observation of outcome, correct use specified; 5% attrition at 2 mo and 23% attrition at 15 mo; analyzed completers only |
| Scherz, 1976 (38)                        | To increase infant car seat use through various intensities of education<br>Parent<br>Individual, print<br>Counseled on seating location: NR                                                                                                                      | 8 wk                               | Behavioral outcomes: Correct infant seat use, which included using an approved car seat or car bed attached by seat belt, self-reported on a survey<br>Health outcomes: NR<br>Harms measure: NR                                                                                                                              | Reported safe car seat use:<br>IG4: 22%<br>IG3: 22%<br>IG2: 8%<br>IG1: 12%<br>CG: 9%<br><i>P</i> < 0.001<br>IG3 and IG4 vs. IG1, IG2, and CG: <i>P</i> < 0.001                                                                                                                                                       | Fair to poor: Did not report baseline characteristics, report of 100% follow-up at 8 wk is suspicious; 47% attrition at 9–12-mo follow-up (results not shown)                                        |
| <b>Antepartum PC setting only</b>        |                                                                                                                                                                                                                                                                   |                                    |                                                                                                                                                                                                                                                                                                                              |                                                                                                                                                                                                                                                                                                                      |                                                                                                                                                                                                      |
| Alvarez and Jason, 1993 (29); study 2    | To increase infant car seat use through education, modeling, and access<br>Parent<br>Individual<br>1 visit<br>Counseled on seating location: NR                                                                                                                   | Discharge and 6 wk after discharge | Behavioral outcomes: Observed correct use of infant safety seat<br>Health outcomes: NR<br>Harms measure: NR                                                                                                                                                                                                                  | Proper use at hospital discharge:<br>IG1: 6/7 (86%\$)<br>IG2: 1/7 (14%\$)<br><i>P</i> < 0.01<br>Proper use at 6-wk visit:<br>IG1:4/7 (57%\$)<br>IG2:1/7 (14%\$)<br><i>P</i> = NS                                                                                                                                     | Fair: Outcome assessed by blinded observers; 0% attrition, but very small sample                                                                                                                     |
| Serwint et al., 1996 (30)                | To see whether prenatal visits to a pediatrician had an effect on health behaviors after birth<br>Parent<br>Individual, print<br>Counseled on seating location: NR                                                                                                | 2 mo after birth                   | Behavioral outcomes: Child did not always use child safety seat in past month, assessed through questionnaire<br>Health outcomes: NR<br>Harms measure: NR                                                                                                                                                                    | Reported use of car seat at last ride:<br>IG: 77% ( <i>n</i> = 54)<br>CG: 86% ( <i>n</i> = 51)<br><i>P</i> = 0.33<br>Reported ownership of infant car seat:<br>IG: 83% ( <i>n</i> = 54)<br>CG: 94% ( <i>n</i> = 51)<br><i>P</i> = 0.15                                                                               | Fair to poor: High attrition >30%; analyzed completers only; low adherence in IG (57%); self-reported outcome and did not specify correct use                                                        |
| <b>Peripartum inpatient setting only</b> |                                                                                                                                                                                                                                                                   |                                    |                                                                                                                                                                                                                                                                                                                              |                                                                                                                                                                                                                                                                                                                      |                                                                                                                                                                                                      |
| Christophersen and Sullivan, 1982 (31)   | To increase infant restraint use through demonstration and access to free car seat<br>Parent<br>Format: individual, demonstration, and access<br>1 contact; time, 2 min—more than time normally needed to discharge patient<br>Counseled on seating location: yes | Discharge and 4–6 wk after birth   | Behavioral outcomes: Observed use and correct use of infant car seat<br>Health outcomes: NR<br>Harms measure: NR                                                                                                                                                                                                             | Correct use of restraint:<br>Discharge: IG, 67%; CG, 0%‡<br>4–6 wk: IG, 29%; CG, 23% ( <i>P</i> = NS)                                                                                                                                                                                                                | Fair: Observed outcome and low attrition (10% at follow-up), but small sample and other methodological flaws                                                                                         |
| Lindqvist, 1993 (39)                     | To increase car seat use through education and tailored counseling and modeling<br>Parent<br>Individual, print, modeling<br>1 contact; time NR<br>Counseled on seating location: NR                                                                               | 9 mo and 15 mo                     | Behavioral outcomes: Self-reported use of car seat by questionnaire<br>Health outcomes: Self-report of motor vehicle accidents resulting in injuries during 0–9 mo<br>Harms measure: NR                                                                                                                                      | Reported more or less frequently restrained at 9 mo:<br>IG: 96.2%<br>CG: 49.4%<br><i>P</i> = NR<br>Reporting car seat use at 15 mo:<br>IG: 98.7%<br>CG: 97.6%<br><i>P</i> = NR<br>Motor vehicle accident–related injuries during 0–9 mo:<br>No motor vehicle accidents resulted in personal injuries in either group | Fair to poor: Self-reported data and correct use not specified; no effort made to follow up on 13% of infants in intervention group whose mothers did not accept the car seat loan                   |

| Study, Year (Reference)                            | Goal and Intervention Format                                                                                                                                                                                                                                                     | Follow-Up Time Frame             | Outcomes                                                                                                                                                      | Results                                                                                                                                                                                                                                                                                                                  | USPSTF Quality Rating                                                                                                                                                |
|----------------------------------------------------|----------------------------------------------------------------------------------------------------------------------------------------------------------------------------------------------------------------------------------------------------------------------------------|----------------------------------|---------------------------------------------------------------------------------------------------------------------------------------------------------------|--------------------------------------------------------------------------------------------------------------------------------------------------------------------------------------------------------------------------------------------------------------------------------------------------------------------------|----------------------------------------------------------------------------------------------------------------------------------------------------------------------|
| Reisinger and Williams, 1978 (40)                  | To increase infant restraint use through education and access to car seat, demonstration modeling<br>Parent<br>Format: varied per group: print; individual; access, modeling<br>1 contact: education component approximately 10 min for IG2<br>Counseled on seating location: no | Discharge and 2–4 mo after birth | Behavioral outcomes: Observation of correct use of infant carrier (infant car seat restrained with car seat belt)<br>Health outcomes: NR<br>Harms measure: NR | Use at hospital discharge (85.55% sample):<br>CG: 6%<br>IG1: 8% (literature + access)<br>IG2: 8% (literature + access + health education)<br>IG3: 11% (literature + free carrier)<br>Use at follow-up (66.5% sample):<br>CG: 21%<br>IG1: 22%<br>IG2: 20%<br>IG3: 28%<br><i>P</i> values: NR<br>Baseline for behavior: NR | Fair: Blinded observation of outcome; measured correct use; reported no difference in baseline SES characteristics between groups                                    |
| Tietge et al., 1987 (41)                           | To increase infant car seat use through education and modeling<br>Parent<br>Individual, video<br>1 contact, 19 min total<br>Counseled on seating location: NR                                                                                                                    | Discharge                        | Behavioral outcomes: Observed correct use of infant car seat<br>Health outcomes: NR<br>Harms measure: NR                                                      | Correct seat use:<br>IG2: 74.2%<br>IG1: 68.8%<br>CG: 63.3%<br><i>P</i> = NS                                                                                                                                                                                                                                              | Fair to poor: 27% attrition (cannot determine whether differential); analyzed completers only; excluded 5 women in intervention group who did not watch film         |
| <b>PC-R education courses</b><br>Barone, 1988 (32) | Conflict theory model of decision making; to increase car seat use, compared with control<br>Parent<br>Group<br>One 2-h session<br>Counseled on seating location: unclear                                                                                                        | Unclear                          | Behavioral outcomes: Observed correctly installed car seat<br>Health outcomes: NR<br>Harms measure: NR                                                        | Correctly installed car seat:<br>IG: 100%<br>CG: 100%<br><i>P</i> = NS                                                                                                                                                                                                                                                   | Fair to poor: Randomization method unclear; age of children in groups NR; unclear whether outcome assessment was blinded                                             |
| Goodson et al., 1985 (42)                          | To increase use of infant car seat through education and modeling<br>Parents<br>Group; film, demonstration, question and answer; one 30-min session<br>Counseled on seating location: NR                                                                                         | 4–6 mo after birth               | Behavioral outcomes: Use of crash-tested car seat on the last ride self-reported during a telephone interview<br>Health outcomes: NR<br>Harms measure: NR     | IG: 96.1%<br>CG: 78.3%<br><i>P</i> < 0.001                                                                                                                                                                                                                                                                               | Fair to poor: Baseline characteristics NR; 17% attrition with analysis of completers only; unclear whether outcome assessors were blinded; correct use not specified |

\* CG = control group; IG = intervention group; MVOI = motor vehicle occupant injury; NR = not reported; NS = not significant; OR = odds ratio; PC = primary care; PC-R = referable to primary care; SES = socioeconomic status; USPSTF = U.S. Preventive Services Task Force; WCC = well-child care.

† Adjusted for SES.

‡ *P* < 0.05 from baseline.

§ Calculated value.
