# Supplementary material
Source: HighWire-hosted journal article supplement (https://www.annals.org/content/suppl/2007/08/06/147.3.194)
Supplement: Williams_RS_147-3-194-DC2-AT08.pdf [file Williams_RS_147-3-194-DC2-AT08.pdf]

Appendix Table 8. Included Studies: Children Age 4 to 8 Years and Booster Seat Use\*

| Study, Year (Reference)     | Target Behavior | Setting  | Study Design; Location; Population Targeted                                                                                                                                                      | Study Population                                                                                                                                                                                                                                                                                                                                                                                                                                                                                                                                                                                                                                                                                                                                                                                                                                                                                                                                                                                                                                                                                                                                                                                                                                                             | Inclusion or Exclusion Criteria                                                                                                                                                                                                                                                                                                                                  | Description of Intervention                                                                                                                                                                                                                                                                                                                                                                                                                                                                                                                       |
|-----------------------------|-----------------|----------|--------------------------------------------------------------------------------------------------------------------------------------------------------------------------------------------------|------------------------------------------------------------------------------------------------------------------------------------------------------------------------------------------------------------------------------------------------------------------------------------------------------------------------------------------------------------------------------------------------------------------------------------------------------------------------------------------------------------------------------------------------------------------------------------------------------------------------------------------------------------------------------------------------------------------------------------------------------------------------------------------------------------------------------------------------------------------------------------------------------------------------------------------------------------------------------------------------------------------------------------------------------------------------------------------------------------------------------------------------------------------------------------------------------------------------------------------------------------------------------|------------------------------------------------------------------------------------------------------------------------------------------------------------------------------------------------------------------------------------------------------------------------------------------------------------------------------------------------------------------|---------------------------------------------------------------------------------------------------------------------------------------------------------------------------------------------------------------------------------------------------------------------------------------------------------------------------------------------------------------------------------------------------------------------------------------------------------------------------------------------------------------------------------------------------|
| Gittelman et al., 2006 (33) | Booster seats   | PC-F; ED | RCT; urban hospital, pediatric ED; families with children age 4–7 y residing in low-socioeconomic ZIP codes who presented to the ED for any chief complaint and reported not using booster seats | <p>Overall:<br/> <i>n</i> = 225<br/>                     Age: NR<br/>                     % male: NR<br/>                     % minority: NR<br/>                     SES: 77.2% had Medicaid and 9.8% were self-pay; all participants resided in ZIP codes representing low socioeconomic communities</p> <p>IG1:<br/> <i>n</i> = 75<br/>                     Mean age: 66.2 mo<br/>                     % male: 52<br/>                     % minority: 71 African American<br/>                     SES: All participants resided in ZIP codes representing low socioeconomic communities</p> <p>IG2:<br/> <i>n</i> = 75<br/>                     Mean age: 64.4 mo<br/>                     % male: 52<br/>                     % minority: 76 African American<br/>                     SES: All participants resided in ZIP codes representing low socioeconomic communities</p> <p>CG:<br/> <i>n</i> = 75<br/>                     Mean age: 65.3 mo<br/>                     % male: 52<br/>                     % minority: 77 African American<br/>                     SES: All participants resided in ZIP codes representing low socioeconomic communities</p> <p>No difference in age, race, sex, or number of children in the home among the study groups</p> | <p>Inclusion: Families with child or children age 4–7 y who weighed 40–80 lb, living in target ZIP codes, presenting with any chief complaint</p> <p>Exclusion: Already used a booster seat; critically ill; primary language not English; no home telephone for follow-up; no automobile at visit or able to return with a automobile the same day of visit</p> | <p>IG1: Education-only; certified car seat technician delivered 5-min instruction on importance of booster seats and their correct use, provided instructions on how to obtain a booster seat and where to go for fitting seats, and answered questions; car seat technicians were trained for 32 h before delivering intervention</p> <p>IG2: Educational and booster seat giveaway; same as IG1, with the addition of a free booster seat properly installed at the end of the visit</p> <p>CG: Standard discharge instructions from the ED</p> |

\* CG = control group; ED = emergency department; IG = intervention group; NR = not reported; NS = not significant; PC-F = feasible for primary care; RCT = randomized, controlled trial; SES = socioeconomic status.
