# Supplementary material
Source: HighWire-hosted journal article supplement (https://www.annals.org/content/suppl/2007/08/06/147.3.194)
Supplement: Williams_RS_147-3-194-DC2-AT09.pdf [file Williams_RS_147-3-194-DC2-AT09.pdf]

Appendix Table 9. Included Studies: Children Age 4 to 8 Years and Booster Seat Use, Continued\*

| Study, Year (Reference)        | Intervention Format                                                                                                                                                                                                                        | Follow-Up Time Frame | Outcomes                                                                                        | Results                                                                 | USPSTF Quality                                                                                                                                                                                                                                    |
|--------------------------------|--------------------------------------------------------------------------------------------------------------------------------------------------------------------------------------------------------------------------------------------|----------------------|-------------------------------------------------------------------------------------------------|-------------------------------------------------------------------------|---------------------------------------------------------------------------------------------------------------------------------------------------------------------------------------------------------------------------------------------------|
| Gittelman et al., 2006<br>(33) | To evaluate the effectiveness of booster seat education for families residing in lower-socioeconomic neighborhoods; ED<br>Parent or child<br>Individual; print, video, demonstration<br>1 session, 5 min<br>Counseled on seat location: NR | 1-mo post-ED visit   | Behavioral outcomes: Self-reported booster seat use<br>Health outcomes: NR<br>Harms measure: NR | IG1: 8.7%<br>IG2: 98.2%<br>CG: 1.3%<br>$P < 0.001$ (IG2 vs. IG1 and CG) | Fair to poor: Groups were similar at baseline for reported characteristics; however, high overall attrition (35%), differential attrition across groups, self-reported outcomes, analyzed completers only, and process measures were not reported |

\* CG = control group; ED = emergency department; IG = intervention group; NR = not reported; USPSTF = U.S. Preventive Services Task Force.
