# Supplementary material
Source: HighWire-hosted journal article supplement (https://www.annals.org/content/suppl/2007/08/06/147.3.194)
Supplement: Williams_RS_147-3-194-DC2-AT10.pdf [file Williams_RS_147-3-194-DC2-AT10.pdf]

Appendix Table 10. Included Studies: Children Age 9 to 19 Years\*

| Study, Year (Reference)   | Target Behavior                                                                            | Setting | Study Design; Location; Population Targeted                                        | Study Population                                                           | Baseline Data on Use                      | Inclusion or Exclusion Criteria                                                                                                                  | Description of Intervention                                                                                                                                                                                                                                                                                                                                                                                  |
|---------------------------|--------------------------------------------------------------------------------------------|---------|------------------------------------------------------------------------------------|----------------------------------------------------------------------------|-------------------------------------------|--------------------------------------------------------------------------------------------------------------------------------------------------|--------------------------------------------------------------------------------------------------------------------------------------------------------------------------------------------------------------------------------------------------------------------------------------------------------------------------------------------------------------------------------------------------------------|
| Stevens et al., 2002 (34) | Seat belts<br>Other behaviors: alcohol and tobacco use;<br>bicycle helmet use; gun storage | PC      | RCT (cluster randomized); 12 rural and urban pediatric PC practices in New England | n = 3145<br>Age: 11.0/11.0 y<br>% male: 54/50<br>% minority: NR<br>SES: NR | IG, 74.4%; CG, 71.9%                      | Inclusion: Fifth- and sixth-grade students attending WCC visits with a parent or guardian<br>Exclusion: Only 1 pair per family could participate | IG: Received counseling from pediatrician during WCC visits; contract for family policy; letter; reminders at follow-up visits; biannual telephone calls alternating parent and child; brochure, newsletters for parents (12) and children (12) on gun safety, seat belt use, and bicycle helmet use<br>CG: Received all the same contacts as the IG, with the information targeting alcohol and tobacco use |
| Macknin et al., 1987 (43) | Seat belts                                                                                 | PC      | CCT; private pediatric group practice; predominantly white, middle class           | n = 385<br>Mean age: 8.35 y<br>% male: NR<br>% minority: NR<br>SES: NR     | Pediatricians estimated baseline use <50% | Inclusion: Age 5–19 y; coming in for a WCC<br>Exclusion: NR                                                                                      | IG: Physician-pediatrician asked a screening question regarding seat belt use—if yes, positive reinforcement, and if no, give facts about seat belt use; patient and physician signed a contract promising use<br>CG: No mention of seat belt use was made                                                                                                                                                   |

\* CCT = controlled clinical trial; CG = control group; IG = intervention group; NR = not reported; PC = primary care; RCT = randomized, controlled trial; SES = socioeconomic status; WCC = well-child care.
