# Supplementary material
Source: HighWire-hosted journal article supplement (https://www.annals.org/content/suppl/2007/08/06/147.3.194)
Supplement: Williams_RS_147-3-194-DC2-AT11.pdf [file Williams_RS_147-3-194-DC2-AT11.pdf]

Appendix Table 11. Included Studies: Children Age 9 to 19 Years, Continued\*

| Study, Year (Reference)   | Intervention Format                                                                                                                                                                      | Follow-Up Time Frame | Outcomes                                                                                                                                             | Results                                                                                                                                                                                                                                                                    | USPSTF Quality                                                                                                                                                                                                                                          |
|---------------------------|------------------------------------------------------------------------------------------------------------------------------------------------------------------------------------------|----------------------|------------------------------------------------------------------------------------------------------------------------------------------------------|----------------------------------------------------------------------------------------------------------------------------------------------------------------------------------------------------------------------------------------------------------------------------|---------------------------------------------------------------------------------------------------------------------------------------------------------------------------------------------------------------------------------------------------------|
| Stevens et al., 2002 (34) | To prevent or delay onset of health risk behaviors and enhance safety behaviors<br>Office systems approach<br>Parent and child<br>Individual, print, telephone<br>34 contacts over 36 mo | 12, 24, 36 mo        | Behavioral outcomes: Child did not always use seat belt in last month, as assessed through questionnaire<br>Health outcomes: NR<br>Harms measure: NR | ORs (CG to IG):<br>12 mo: 0.87 (95% CI, 0.73–1.04)<br><i>P</i> = 0.12<br>24 mo: 0.96 (CI, 0.79–1.15)<br><i>P</i> = 0.65<br>36 mo: 0.89 (CI, 0.73–1.09)<br><i>P</i> = 0.27                                                                                                  | Fair: Reported baseline characteristics and adjusted for several important possible confounding variables; however, self-reported outcomes, 27% attrition, and analyzed completers only                                                                 |
| Macknin et al., 1987 (43) | A single, brief physician intervention to increase seat belt use<br>Parent, child, or adolescent<br>Individual, print<br>One contact; time NR<br>Counseled on seat location: NR          | 12-mo postvisit      | Behavioral outcomes: Observed seat belt use: 12-mo follow-up self-report questionnaire of seat belt use<br>Health outcomes: NR<br>Harms measure: NR  | Not using seat belt before visit:<br>IG: 63% (calculated value)<br>CG: 61% (calculated value)<br>Not wearing before visit who were wearing after visit:<br>IG: 38%<br>CG: 5%<br><i>P</i> < 0.001<br>Reporting seat belt use at 1 y:<br>IC: 62%<br>CG: 67%<br><i>P</i> = NS | Fair: Reported baseline characteristics and observed outcomes; behavior change analyzed only among those not using seat belts before visit, and very short-term observed follow-up; longer-term follow-up was self-reported, and higher attrition (35%) |

\* CG = control group; IG = intervention group; NR = not reported; NS = not significant; OR = odds ratio.
