# Supplementary material
Source: HighWire-hosted journal article supplement (https://www.annals.org/content/suppl/2007/08/06/147.3.194)
Supplement: Williams_RS_147-3-194-DC2-AT12.pdf [file Williams_RS_147-3-194-DC2-AT12.pdf]

Appendix Table 12. Included Studies: Adults\*

| Study, Year (Reference) | Target Behavior | Setting | Study Design; Location; Population Targeted                 | Study Population                                                                                                                                              | Inclusion or Exclusion Criteria                                                                                                                                                                                                                                 | Description of Intervention                                                                                                                                                                                                                                           |
|-------------------------|-----------------|---------|-------------------------------------------------------------|---------------------------------------------------------------------------------------------------------------------------------------------------------------|-----------------------------------------------------------------------------------------------------------------------------------------------------------------------------------------------------------------------------------------------------------------|-----------------------------------------------------------------------------------------------------------------------------------------------------------------------------------------------------------------------------------------------------------------------|
| Hempel, 1992 (35)       | Seat belts      | PC      | RCT; rural primary care center in a primarily indigent area | Overall:<br>n = 360<br>IG:<br>Mean age: 30 y<br>% male: 22.9<br>% minority: 0<br>SES: NR<br>CG:<br>Mean age: 30 y<br>% male: 31.1<br>% minority: 0<br>SES: NR | Inclusion: Between ages 14 and 60 y<br>Exclusion: Acutely ill (temperature >101.0 °F, severe pain, mental status changes, or other acute distress), declined to sign a release, or could not comprehend the intervention (intellectual impairment or psychosis) | IG: Viewed a 6-min film explaining why one should wear seat belts; nurse practitioner gave an appeal to wear seat belts on the basis of her personal conviction<br>CG: Viewed a 6-min film on general preventive health care guidelines with no mention of seat belts |

\* CG = control group; IG = intervention group; NR = not reported; PC = primary care; RCT = randomized, controlled trial; SES = socioeconomic status.
