# Supplementary material
Source: HighWire-hosted journal article supplement (https://www.annals.org/content/suppl/2007/08/06/147.3.194)
Supplement: Williams_RS_147-3-194-DC2-AT13.pdf [file Williams_RS_147-3-194-DC2-AT13.pdf]

**Appendix Table 13. Included Studies: Adults, Continued\***

| Study, Year (Reference) | Intervention Format                                                                                          | Follow-Up Time Frame | Outcomes                                                                                                                           | Results                                                                                                                                                                          | USPSTF Quality                                                                                                  |
|-------------------------|--------------------------------------------------------------------------------------------------------------|----------------------|------------------------------------------------------------------------------------------------------------------------------------|----------------------------------------------------------------------------------------------------------------------------------------------------------------------------------|-----------------------------------------------------------------------------------------------------------------|
| Hempel, 1992 (35)       | To increase seat belt use<br>Adult<br>Individual; video<br>2 contacts totaling approximately 8 min over 6 mo | 6 mo                 | Behavioral outcomes: Seat belt use assessed through questionnaire using a linear scale<br>Health outcomes: NR<br>Harms measure: NR | IG seat belt use:<br>Baseline: 22%<br>6 mo: 37.3%<br><i>P</i> < 0.001<br>CG seat belt use:<br>Baseline: 20%<br>6 mo: 33.6%<br><i>P</i> < 0.001<br><i>P</i> = NS (between groups) | Fair to poor: High attrition (25%); analyzed completers only; outcome was self-reported and was not well masked |

\* CG = control group; IG = intervention group; NR = not reported; NS = not significant; USPSTF = U.S. Preventive Services Task Force.
